# Supplementary material for: In silico-determined compound from the root of Pueraria lobate alleviates synaptic plasticity injury induced by Alzheimer's disease via the p38MAPK-CREB signaling pathway
Source: Royal Society of Chemistry journal article supplement (doi:10.1039/d0fo02388d), 2020-12-22
Supplement: d0fo02388d1.pdf [file d0fo02388d1.pdf]

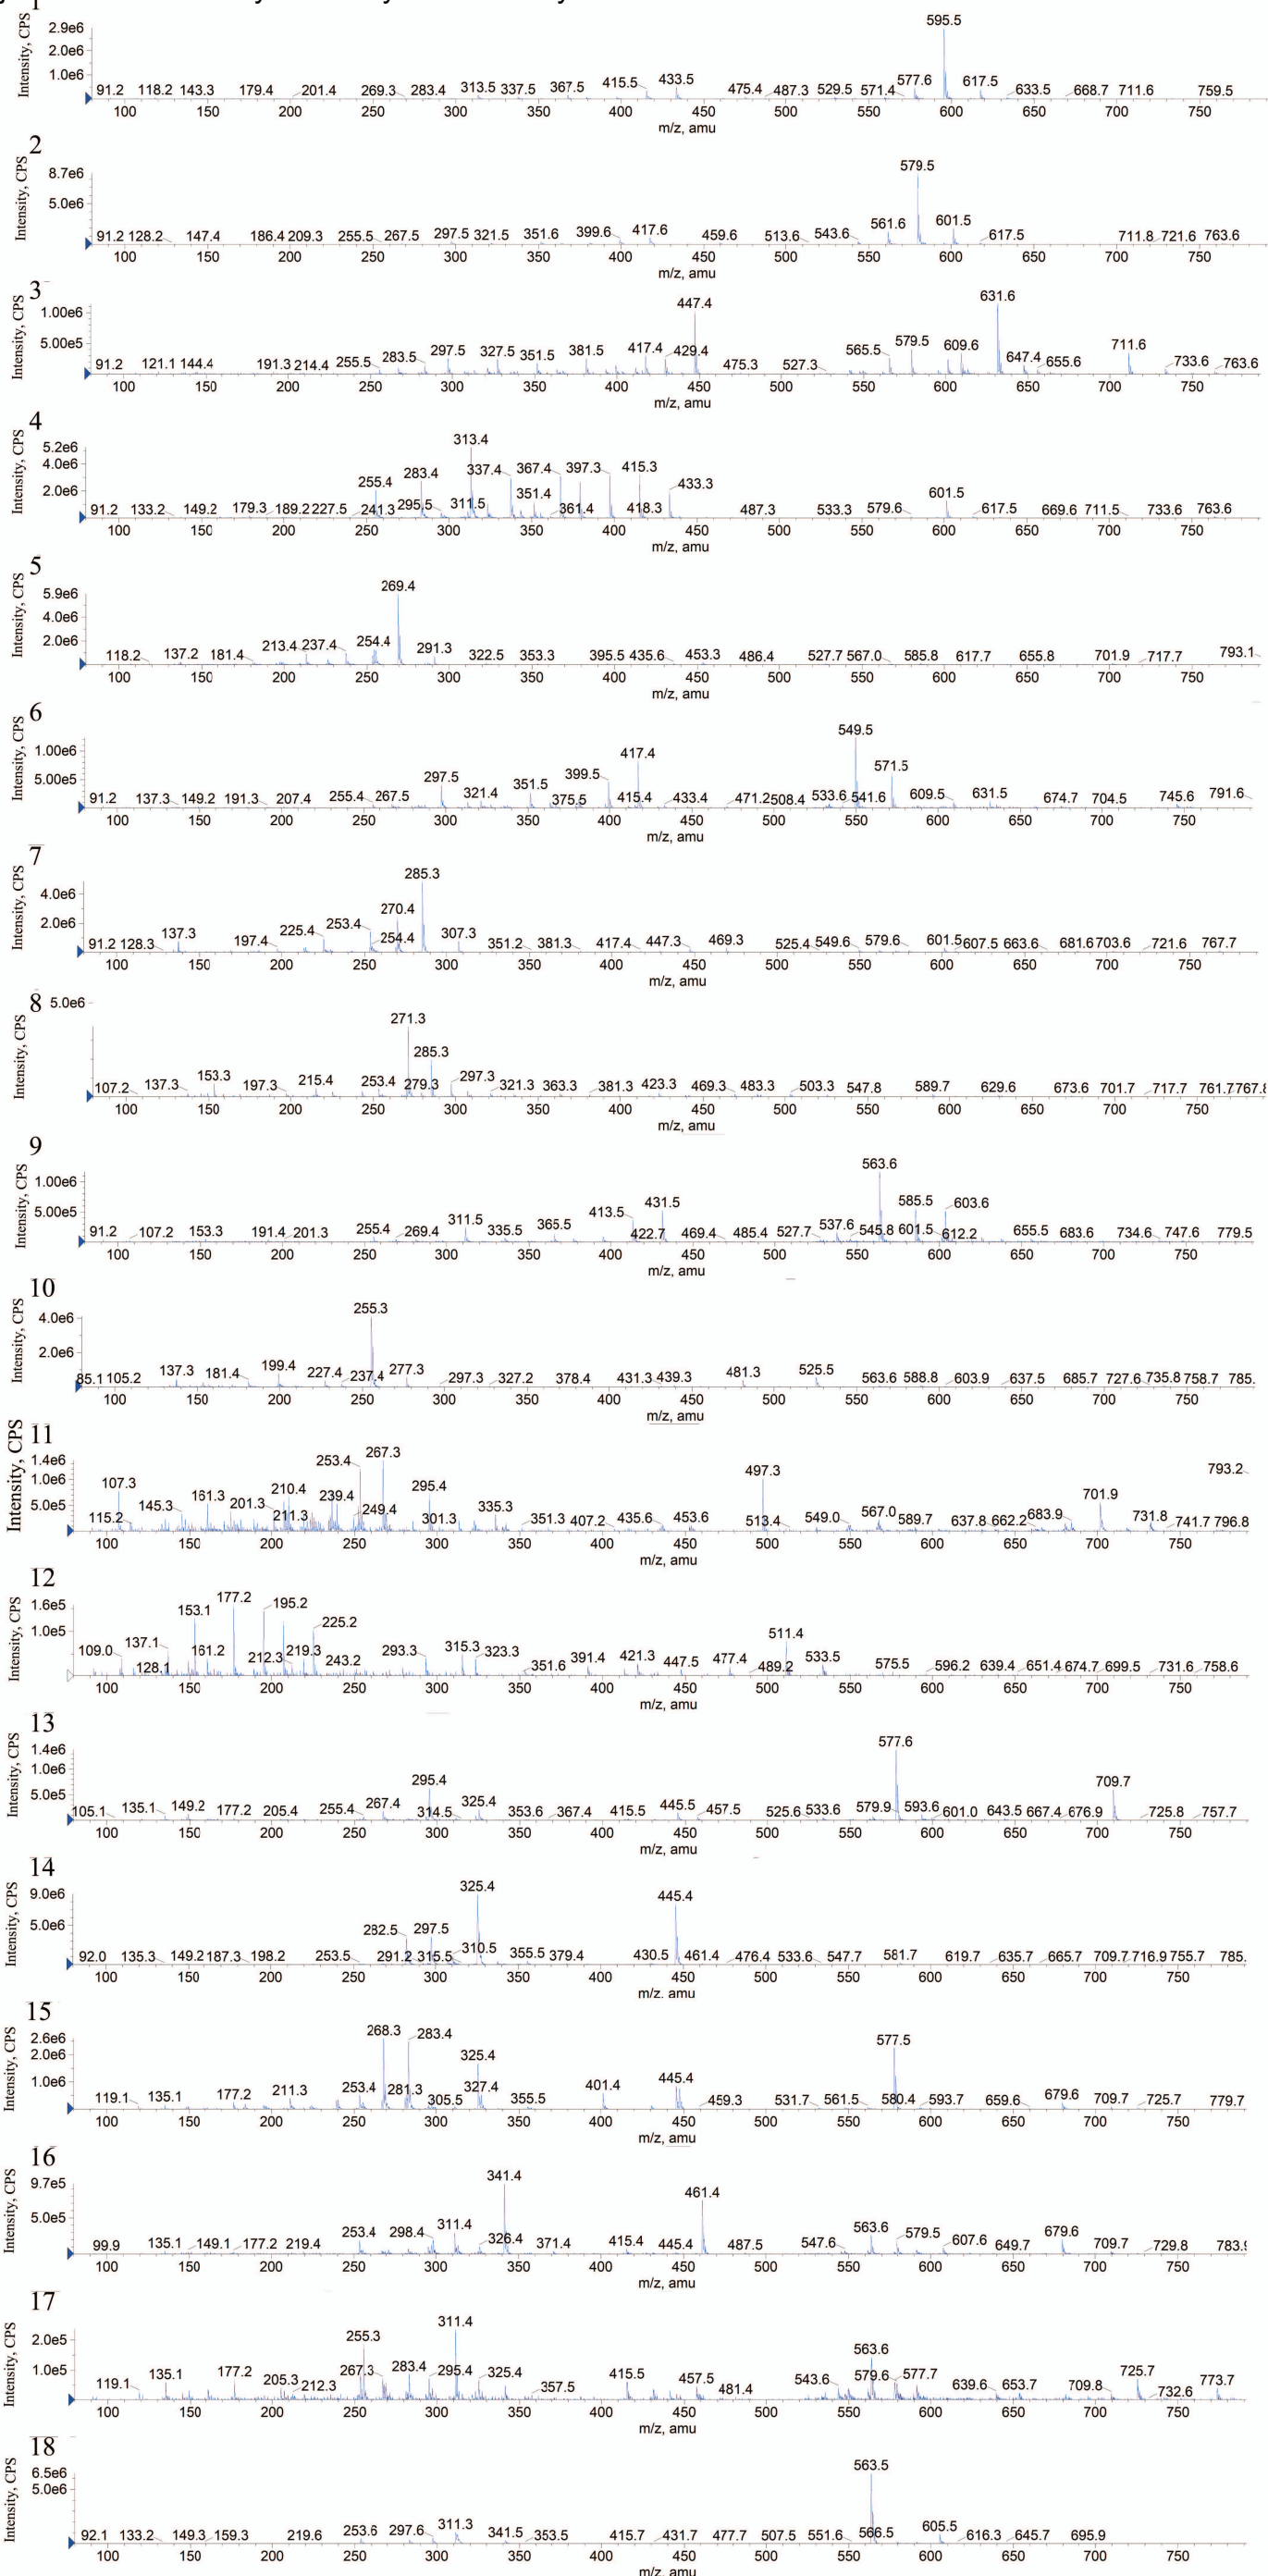

Supplementary 1. HPLC-MS/MS chromatogram obtained from the ethanol extract from root of *P. lobate*.

- (1) 3'-Hydroxy puerarin 4'-O-glucoside, (2) Daidzin 4'-O-glucoside, (3) Puerarin 7-O-glucoside, (4) 3'-Hydroxy puerarin, (5) Formononetin, (6) Mirificin, (7) 3'-Methoxy daidzin, (8) Genistein, (9) Ononin, (10) Daidzein, (11) Puerol B, (12) Protocatechualdehyde, (13) Isoliquiritigenin, (14) 3'-Methoxy puerarin, (15) 5-Hydroxy ononin, (16) Daidzin, (17) Puerarin, (18) Pueroside A.
